# Supplementary material for: The Rac GTP Exchange Factor TIAM-1 Acts with CDC-42 and the Guidance Receptor UNC-40/DCC in Neuronal Protrusion and Axon Guidance
Source: PubMed Central journal article supplement (PMC3343084; doi:10.1371/journal.pgen.1002665), 2012-04-26
Supplement: pgen.1002665.s003.pdf [file pgen.1002665.s003.pdf]

A

EVH1 domain comparisons (BLAST)

```
Ce      21  TLRIDAELFELSQDGQKWDKEVHPHLDGRLANVRVFNAFDSSPRLLATSSSGQVLLDTL  80
          R  AELF LS D  W    P L    V V          S    D L
As      3   VVRFWAELFQLSADRSQW-AILYPSL-----LSVTVSEISRKRHAVHVTATSASRIIVDQL  57

Ce      81  IPMGEKVHKVSDFFVYLKTEGRTIGFNTLSSRDTSLLISQATNTTAFNMF  125
          V  VS  F Y    T G N S D          T  F  F
As      58  LDSSSQVTRVSSCFAYWRHQCYTYGVNFVSAEDCDHFCELSMETSRLFIFK  107
28/109 = 26% identity

As      5   RFWAELFQLSADRS---QWAILYPSLLSVTVSEISRKRHAV-HVTA--TSASRIIVDQLL  58
          R WAE F  SA    W    L V  I    H TA    I  L
Dm     39  RLWAEVFHVSASGAGTVKWQQVSEDLVPVNITCIQDSPECIFHITAYNSQVDKILDVRLV  98

As      59  -DSSSQVTRVSSCFAYWRHQCYTYGVNFVSAEDCDHFCELSMETSRLFIFKFGTTS  111
          S CF YW    T G NF S D  F E    F    S
Dm     99  QPGTRIGQASECFVYWKDPMTNDTWGLNFTSPIDAKQFRECCSPSFKFSRKASSS  153

Ce      21  TLRIDAELFELSQDGQ---KWDKEVHPHLDGRLANVRVFNAFDSSPRLLATSSSGQVLL  77
          R  AE F  S G    KW  V  L  N          A  S  L
Dm     39  --RLWAEVFHVSASGAGTVKW-QQVSEDLVP--VNITCIQDSPECIFHITAYNSQVDKIL  93

Ce      78  DT-LIPMGEKVHKVSDFFVYLKTE--GRTIGFNTLSSRDTSLLISQATNTTAFNM----F  125
          D  L  G    S  FVY K    T G N S D          F
Dm     94  DVRLVQPGTRIGQASECFVYWKDPMTNDTWGLNFTSPIDAKQFRECCSPSFKFSRKASSS  153
28/109 = 26% identity
```

B

PDZ domain comparisons (BLAST)

```
Ce      405  DYFVRKTNGRLGLTIYAHNDDGVIRAEVRGVTSFAPRCAQVGDSVVAVDSELISSVPDZR  469
          Y  KT  LGLTI A  D VI AEVR V          QVGD VV VD  IS
As      410  EYRIEKTDRSLGLTICARQVDDVIKAEVRAVRD-GTTMVQVGDTVVSVD EHPISEL-----  464

Ce      470  EMOVEDBYOKRNASDVEKLLRIGKVIHLRRK  481
          A  VE LLR          LRR+
As      465  -----QTADQVETLLRSATALVLRRL  485
36/90 = 40% identity
```

```
As      410  -EYRIEKTDRSLGLTICARQVDDVIKAE-----VRAVRDGTMTVQVG-----DTVVSVD E H  459
          E          G  A          V  V D          G  D
Dm     1185  VELQRTTLEQMWFSGSVEAELIENAERQDELCCYVSRVEDKSVAMHNGI IKGDEIMVINGA  1244

As      460  PISELQTADQVETLLRSATALVLRRL  485
          S L          E L
Dm     1245  IVSDLDMM-YLESVLQ-----E  1260
```

```
Ce      405  DYFVRKTNGRL-GLTIYAHNDDGVIRAEVRGVTSFAPRCAQVGDSVVAVDSELISSVPDZ  468
          R T  G  A          R          R  V D VA  I  D
Dm     1185  VELQRTTLEQMWFSGSVEAELIENAERQDE--LCCYVSR---VEDKSVAMHNGI IKG--DE  1237

Ce      469  REMVEDBYKRNASDVEKLLRIGKVIHLRRK  481
          SD          V
Dm     1238  IMVINGAI---VSDLD-MMYLESVLQ---E  1260
15/90 = 17% identity
```

C

EVH1 ClustalW

Ce TLRIDAELEFELSQDGO---KWDKEVHPHLDGRLANVRVFNAFD-DSSPRLATS-SSGQ  
As VVRFWAELFQLSADRS---QWAILYP-----SLLSVTVSEISR-KRHAVHVTAT-SASR  
Dm --RLWAEVFHVSASGAGTVKWQOVSE-----DLVPVNITCIQDSPECIFHITAYNSQVDK  
\* : \*\* : \* . : \* : \* \* : : : . . :

Ce VLLDTLIPMGEKVHKVSDFVYLKTEGR--TIGFNLSRDTSLLISQATNTTAFNMF---  
As IIVDQLLDSSSQVTRVSSCFAYWRHQCO--TYGVNFVSAEDCDHFCELSMETSRIKF---  
Dm ILDVRLVQPGTRIGQASECFVYWKDPMTNDTWGLNFTSPIDAKQFRECCSPSFKFSRKASSS  
: : \* : . : : : . \* . \* . \* : \* \* . \* . \* . : . . : \*

PDZ ClustalW

Ce -DYFVRKTNGRLGLTIYAHNDDGVIRAEVGVTSFAPRCAQVGDSSVAVDSELISSVPDZ  
As -EYRIEKTDRSLGLTICARQVDDVIKAEVRAVR-DGTTMVQVGDVVSVDEHPISELQT-  
Dm VELQRTTLEQMWGFSVEAELIENAERQDELCCYVSRVEDKSVAMHNGIIGDEIMVING-  
: . : \* : : \* . : . . : : . \* . : . . \* :

Ce REMVEDBYKRNASDVEKLLRIGKVIHLRRK  
As -----ADQVETLLRSATALVLRRL  
Dm -----AIVSDLMMYLESVLQE-  
\* . \* \* : .
