# Supplementary material for: The Rac GTP Exchange Factor TIAM-1 Acts with CDC-42 and the Guidance Receptor UNC-40/DCC in Neuronal Protrusion and Axon Guidance
Source: PubMed Central journal article supplement (PMC3343084; doi:10.1371/journal.pgen.1002665), 2012-04-26
Supplement: pgen.1002665.s009.pdf [file pgen.1002665.s009.pdf]

tiam-1 5' promoter region

(+) TIAM-1p-F

CGCATGCCAAGACTACTTTGGAAGTGTCC

(-) TIAM-1p-R

CGCATGCTCTGTAAAAAATATAAATTTTTAGTTGT

yk370h9 tiam-1 cDNA ORF

(+) TIAM1-CHERRY F

CCCTGCAGGATGGGCTCACGCCTCTCATG

(-) TIAM1 PTN R BamHI

CGGATCCGGTTTTGAATTTTCGATGTTCCCTTAGA

gfp::mig-2

(+) mig-2 XmaI myrAgel

GCCCGGGATGTCTTCACCGTCGAGGACCGGTCCAGATCAAATGTGTAGTTGT  
TGG

(-) mig-2 3'NheI

GGCTAGCTTACATAATATTGCAAGACTTCTTC

An *XmaI* fragment containing *gfp* coding region from vector pPD119.16 (A. Fire) was cloned into the *AgeI* site introduced by the mig-2 *XmaI*myrAgel primer (underlined).

cdc-42 coding region

(+) cdc-42 5'

GGCTAGCGGCGGAATGCAGACGATCAA

(-) cdc-42 3'

GGCTAGCCTAGAGAATATTGCACTTCTTCT

cdc-42(G12V) site directed mutagenesis

(+) cdc-42 -G12V

AGTTTTACCGACAGCTACATCTCCAACGACGAC

(-) cdc-42 +G12V

GTCGTCGTTGGAGATGTAGCTGTCCGGTAAAAC

TIAM-1DHPH GEF

(+) tiam-1 dh1

GTCTAGAGCACCGTCTCAACTCGACG

(-) tiam-1 dh2

GTCTAGATTTTGAATTTTCGATGTTTCCTTAGA

TIAM-1 DHPH T to F site directed mutagenesis

(+) Tiam-1 DH/PH T-F 1

GCTCTGCAAGAATTGTTGGTCTTTGAGAAGAAATATGTCAGCGATCTTCGAG

(-) Tiam-1 DH/PH T-F 2

CTCGAAGATCGCTGACATATTTCTTCTCAAAGACCAACAATTCTTGCAGAGC

UNC-73 DHPH GEF 1

(+) unc-73DH1F

GGCTAGCGAGAAGAAGATCAATGAACGAC

(-) unc-73DH1R

GGCTAGCTCCAAGTGAAGTAAGCCTCCG

UNC-73DHPH1 S to F site directed mutagenesis

(+) unc-73DH1StoF+

CCAATGCGAGAGCTTATTCAATTCGAACGGGATTATATCAAAGAT

(-) unc-73DH1StoF-

ATCTTTGATATAATCCCGTTTCGAATTGAATAAGCTCTCGCATTGG

UNC-73 DHPH GEF 2

(+) unc-73DH2F

GGCTAGCCCTGCAAAGGTGGAGAAGAC

(-) unc-73DH2R

GGCTAGCGTTGTATCGTCTCGGATCCAC

TIAM-1 for mammalian cell culture

(+) TIAM-1 CELL F1

CAGATCTCCATGTAGTAGTGACACAGAGATTG

(-) TIAM-1 CELL R1

GGGATCCTTATTTTGAATTTTCGATGTTCCCTTAGA

CED-10 for mammalian cell culture

(+) CED-10 CELL F1

CGAATTCATGCAAGCGATCAAATGTGTCG

(-) [1]CED-10 CELL R1

GGGATCCTTAGAGCACCGTACACTTGCT
